# Supplementary material for: Theoretical prediction of electronic properties and contact barriers in a metal/semiconductor NbS2/Janus MoSSe van der Waals heterostructure
Source: Royal Society of Chemistry journal article supplement (doi:10.1039/d3na00852e), 2024-01-01
Supplement: d3na00852e1.pdf [file d3na00852e1.pdf]

## Supporting Information (SI)

### **Theoretical prediction of electronic properties and contact barriers in metal/semiconductor NbS<sub>2</sub>/Janus MoSSe van der Waals heterostructure**

P. H. Nha,<sup>1</sup> Chuong Q. Nguyen,<sup>2</sup> Nguyen N. Hieu,<sup>3,4</sup> Huynh V. Phuc,<sup>5</sup>  
and Cuong Q. Nguyen<sup>3,4,\*</sup>

<sup>1</sup>*Faculty of Electrical Engineering, Hanoi University of Industry, Hanoi 100000, Vietnam.*

<sup>2</sup>*Department of Materials Science and Engineering, Le Quy Don Technical University, Hanoi 100000, Vietnam*

<sup>3</sup>*Institute of Research and Development, Duy Tan University, Da Nang 550000, Vietnam*

<sup>4</sup>*Faculty of Natural Sciences, Duy Tan University, Da Nang 550000, Vietnam*

<sup>5</sup>*Division of Theoretical Physics, Dong Thap University, Cao Lanh 870000, Vietnam*

\*Corresponding authors: [nguyenquangcuong3@duytan.edu.vn](mailto:nguyenquangcuong3@duytan.edu.vn)

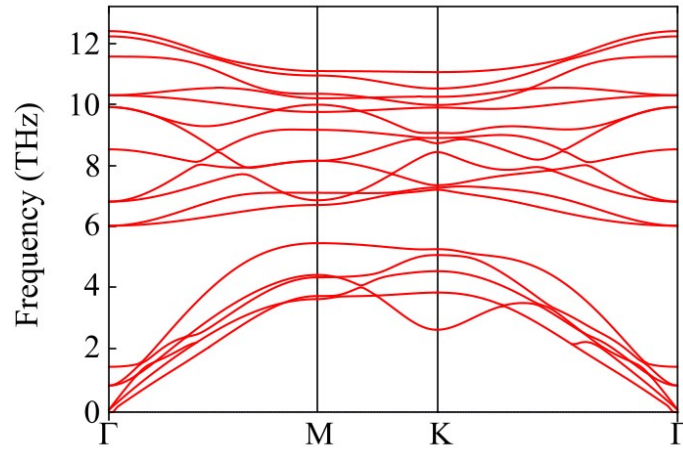

Fig. S1. Phonon dispersion curves of NbS<sub>2</sub>/MoSSe heterostructure for the most energetically favorable stacking configuration.

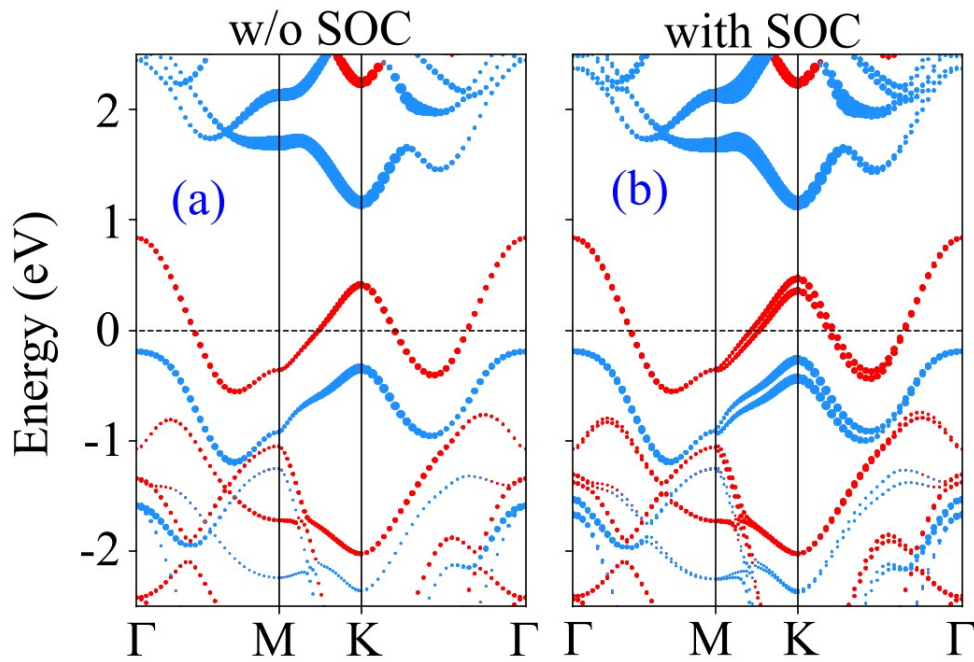

Fig. S2. Projected band structures of NbS<sub>2</sub>/MoSSe heterostructure for the most energetically favorable stacking configuration (a) without (w/o) SOC and (b) with SOC effect.

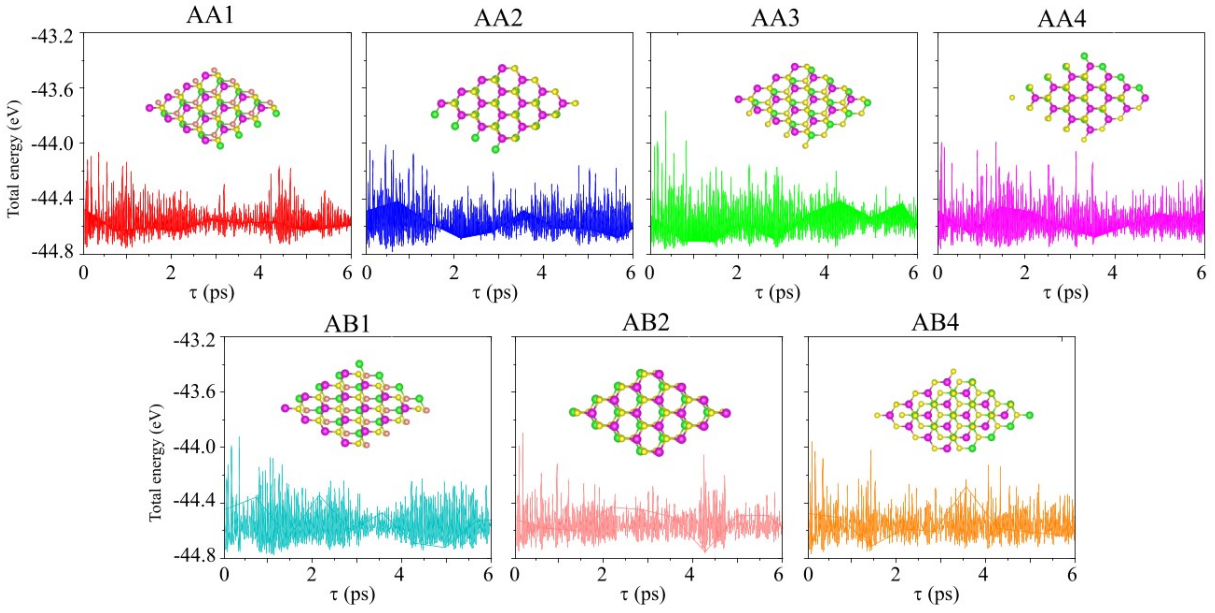

Fig. S3. The fluctuation in total energy as a function of time steps of the  $\text{NbS}_2/\text{MoSSe}$  heterostructure for different stacking configurations. The insets represent the atomic structure of heterostructure after heating to 6 ps.
